# Supplementary material for: Quantification of Sterol and Triterpenol Biomarkers in Sediments of the Cananéia-Iguape Estuarine-Lagoonal System (Brazil) by UHPLC-MS/MS
Source: Hindawi journal article supplement (doi:10.1155/2016/8361375), 2016-01-01
Supplement: f1 [file 8361375.f1.pdf]

**Table S1.** Mass spectrometry parameters for MRM transitions: Q1 voltage, Q3 voltage and collision energy (CE)

| Compound                                    | Transitions          | Q1 (V) | Q3(V) | CE (V) |
|---------------------------------------------|----------------------|--------|-------|--------|
| cholesterol                                 | 369>95 <sup>*</sup>  | -17    | -19   | -32    |
|                                             | 369>135              | -25    | -28   | -22    |
| epicoprostanol/coprostanol/cholestanol      | 371>81               | -13    | -17   | -36    |
|                                             | 371>95 <sup>*</sup>  | -17    | -19   | -29    |
| ergosterol                                  | 379>69 <sup>*</sup>  | -30    | -29   | -26    |
|                                             | 379>83               | -30    | -17   | -24    |
| brassicasterol                              | 381>69 <sup>*</sup>  | -13    | -28   | -29    |
|                                             | 381>135              | -25    | -28   | -24    |
| campesterol                                 | 383>81               | -25    | -16   | -40    |
|                                             | 383>161 <sup>*</sup> | -25    | -18   | -21    |
| stigmasterol                                | 395>81 <sup>*</sup>  | -18    | -16   | -41    |
|                                             | 395>107              | -18    | -22   | -35    |
| $\beta$ -sitosterol                         | 397>81               | -14    | -16   | -41    |
|                                             | 397>95 <sup>*</sup>  | -14    | -19   | -34    |
| stigmastanol                                | 399>95 <sup>*</sup>  | -14    | -19   | -33    |
|                                             | 399>149              | -14    | -29   | -22    |
| lupeol/ $\beta$ -amyirin/ $\alpha$ -amyirin | 409>95 <sup>*</sup>  | -29    | -19   | -37    |
|                                             | 409>137              | -19    | -16   | -22    |

\* transition of quantification
